# Supplementary material for: Principal threats to the conservation of freshwater habitats in the continental biogeographical region of Central Europe
Source: Springer Nature journal article supplement (doi:10.1007/s10531-019-01865-x), 2019-10-15
Supplement: MOESM1 [file 17276466]

**Appendices**

##

## Appendix 1

## Running and standing water habitats in Poland

**3110 Oligotrophic waters (*Littorelletalia uniflorae*)**

Lobelia-type lakes (Oligotrophic waters containing very few minerals of sandy plains) are most often inland lakes. Only a few of them have an inflow of water from temporary water courses. Characteristic features of lobelia-type lakes include specific physicochemical properties of their waters and the occurrence of characteristic vegetation – isoetids. The occurrence of isoetids from the *Lobelion dortmannae* and *Isoëtion lacustris* alliances is possible only in lakes with low mineralisation and low calcium content in water. The features which are necessary for a lobelia-lake to remain in a good condition and guarantee the presence of specific vegetation are: transparent bluishcoloured water, pH of water from 5.5 to 7.5, electrolytic conductivity < 100 µS cm-1, trace quantity of calcium, low concentrations of nitrogen and phosphorus, high transparency of water, characteristic composition of plankton, and no algal blooms. The plant species that differentiate this habitat from other lakes are water lobelia *Lobelia dortmanna*, *Isoëtes lacustris, Isoëtes echinospora, Littorella uniflora, Myriophyllum alterniflorum, Luronium natans.*Lobelia lakes in Poland are situated in the Pomeranian Lake District, Bory Tucholskie forest, Charzykowska plain, and the Kashubian Lake District. The greatest numbers occur near the towns of Kartuzy, Sulęczyn, Bytów, Miastko, Bobolice, Czaplinek, Złocieniec, Swornegacie, and Charzykowy. Apart from these areas, there is also one lake (Długie k. Łukty) classified as lobelia lake in the Olsztyńskie Lakeland. Moreover, the abundant presence of quillwort *Isoëtes lacustris* was found in Wielki Staw lake located in the Karkonosze Mountains (SW Poland).

**3130 Oligo to mesotrophic waters (*Littorelletea Isoëto-Nanojuncetea*)**

Habitat 3130 is comprised of both oligotrophic and mesotrophic waters, and includes intermediate types. While each type supports a characteristic plant community, the range of conditions to be expected in this habitat type is broad. Substrates of oligotrophic to mesotrophic waters include silt, sand, gravel, stones and boulders.

Habitat occurs in Poland mainly in the continental region and only in the alpine region. Associations included in habitat 3130 are usually created by species reaching the eastern border of range in Poland, most often observed in the western, north-western, southern and south-eastern parts of the country.

**3140 Hard oligo-mesotrophic waters with benthic vegetation of *Chara* spp.**

Lakes and ponds with waters are fairly rich in dissolved elements (often pH 6–7), or with mostly blue to greenish, very clear waters, from poor to moderate in nutrients, base-rich (pH >7.5). The bottom of these unpolluted water bodies are covered with charophytes, *Chara* and *Nitella*, algal carpets. In the continental region this habitat type includes small calcareous-rich oligo-mesotrophic gyttja pools with dense *Chara* spp. carpets, often surrounded by various eutrophic fens and pine bogs.

This habitat occurs in Poland mainly in the CBR, most often observed in the lakes districts located in the northern part of the country.

**3150 Natural eutrophic lakes with *Magnopotamion* or *Hydrocharition* - type vegetation**

In the system of habitat conservation in Poland, the habitat 3150 has two subtypes: 3510-1 Eutrophic lakes and 3510-2 Eutrophic oxbow lakes and natural small water bodies. Natural lakes and permanent small water reservoirs (ponds, kettle lakes) as well as cut-off fragments of river channels are characterized by water-free macrophytes (*Potamion* and partly *Nymphaeion*), macrophytes rooted in the bottom with floating leaves (part of *Nymphaeion*), as well as primitive clusters of small plants floating on the water surface (*Lemnetea*). Natural eutrophic lakes have nutrient levels that are higher than those of oligotrophic, dystrophic or mesotrophic lakes, what results in higher natural productivity, and thus typically biodiversity. However, many lakes of this type have been damaged by over-enrichment with nutrients, what has led to hypertrophic conditions and a reduction in species-richness.

Habitat 3150 occurs throughout the country, in the largest numbers grouped within the following lake districts: Mazurskie, Pomorskie, Wielkopolskie, Łęczysko-Włodawskie.

**3160 Natural dystrophic lakes and ponds**

Small lakes with acidic water, often tinted brown due to peat, are often surrounded by peat bogs and bog woodland (for example habitat types 7140; 7110; 91D0). The main source of humic acids in these water lakes are peat bog waters coming from the moth. Their waters fill small depressions of the terrain where humic acids reach the water. Their common feature is location in the highest part of the catchment, usually on or near a watershed divide. They accumulate the whole load of mineral substances which is introduced into the water from the usually small catchment and directly from atmospheric precipitation.

Dystrophic lakes occur mainly in the area of Pomerania, the Masurian and Suwalki Lakeland, and less frequently in Greater Poland and the Sudetes. Until recently, non-degraded dystrophic lakes have also occurred in the Łęczyńsko-Włodawskie Lakeland. Beyond these regions, they exists rather individually, on dispersed positions.

**3220 Alpine rivers and the herbaceous vegetation along their banks**

The habitat represent a section of the river bed (along with a floodplain) clearly formed with a stone, at least a few meters wide, usually with islands situated in the river's channel. They occupy different areas: from small fugitives in the bends of streams, to extensive, even in hectares, areas on river-like sections of rivers. The natural plant cover shows a different degree of short-circuit, consisting mainly of pioneer species, often involving mountain species, moving downstream is variable.

The alpine rivers and the herbaceous vegetation along their banks, are commonly found on Carpathian rivers and streams. A large part of the river sections with gravel banks (and bottom) is covered by Natura 2000. These are: „Dolna Skawa” (Skawa), „Torfowiska Orawsko-Nowotarskie” (Czarny Dunajec), „Tatry” (Siwa Woda, Rybi Potok, Potok Filipczański), „Białka” (Białka), „Środkowy Dunajec z dopływami” (Kamienica Łącka, Ochotnica, Dunajec), „Ostoja Magurska” (Wisłoka), „Wisłoka z dopływami” (Wisłoka, Ropa), „Jasiołka”, „Bieszczady” (San). Rivers in the mountains Silesian Beskid and Żywiecki Beskid have developed mainly gravel sections outside Natura 2000 areas because protection of the upper parts of these rivers is not suitable due to morphological conditions. Protection refers only to a stony, mountainous sections of the rivers. Due to the nature of mountain basin morphology, considered river sections are located in the deep valleys, show high differential narrow river beds often with thresholds and waterfalls, high flow velocities and significant fluctuations of water level.

**3240 Alpine rivers and their ligneous vegetation with *Salix elaeagnos***

The habitat is generally present in the form of dense willow thickets with a significant share of *Salix eleagnos*, *S. purpurea*, in admixture also *Myricaria germanica*, *S. fragilis, S. triandra*, and sometimes also *Alnus glutinosa*, and in the lower positions *S. viminalis*. These thickets form the patches of the *Salici-Myricarietum* located on established stones in the mountainous sections of the rivers.

The habitat occurs in the Western Beskids Mountains - 9 areas of Natura 2000: „Dolna Soła”, „Torfowiska Orawsko-Nowotarskie”, „Górny Dunajec”, „Dolina Białki”, „Środkowy Dunajec z dopływami”, „Tatry”, „Biała Tarnowska”, „Wisłoka z dopływami”, „Ostoja Magurska”. The center of occurrence is Podhale and Spisz.

**3260 Water courses of plain to montane levels with the *Ranunculion fluitantis* and *Callitricho-Batrachion* vegetation**

This habitat type is characterised by the abundance of water-crowfoots *Ranunculus* spp., subgenus *Batrachium* (*Ranunculus fluitans, R. penicillatus* ssp. *penicillatus, R. penicillatus* ssp. *pseudofluitans*, and *R. peltatus* and its hybrids). Floating mats of these white-flowered species are characteristic of small river in early to mid-summer. They may modify water flow, promote fine sediment deposition, and provide shelter and food for fish and invertebrate animals.

The geographical range of a habitat in Poland covers the entire lowland Poland, highlands and lower mountain positions. Especially well-developed communities are observed mainly in the Western Pomerania, Lower Silesia and Masurian Lake District

**3270 Rivers with muddy banks with *Chenopodion rubri* p.p. and *Bidention* p.p. vegetation**

The habitat is represented by muddy river banks of plain to submontane levels, with annual pioneer nitrophilous vegetation of the *Chenopodion rubri* p.p. and the *Bidention* p.p. alliances. During spring and at the beginning of summer, corresponding sites look like muddy banks without any vegetation (late development in the year). If the conditions are not favorable, this vegetation has a weak development or could be completely absent.

Habitat occurs in Poland mainly in the continental region, most often observed in the banks of large and medium rivers.

**Appendix 2**

**Evaluation criteria of habitat status and indices of specific structure and functions** for natural habitat 3110 Lobelia lakes (Oligotrophic waters containing very few minerals of sandy plains); 3130 oligo-to-mesotrophic waters (*Littorelletea Isoëto-Nanojuncetea*); 3140 hard oligo-mesotrophic waters with benthic vegetation of *Chara* spp.; 3150 natural eutrophic lakes with *Magnopotamion* or Hydrocharition-type vegetation; 3160 natural dystrophic lakes and ponds; 3220 alpine rivers and the herbaceous vegetation along their banks; 3240 alpine rivers and their ligneous vegetation with *Salix elaeagnos*; 3260 water courses of plain to montane levels with *Ranunculion fluitantis* and *Callitricho-Batrachion* vegetation; 3270 rivers with muddy banks with *Chenopodion rubri* p.p. and *Bidention* p.p. vegetation (Mróz 2010; 2012a,b; 2015, 2017).

| Parameters | Indicator | FV  (favourable) | U1  (unfavourable inadequate) | U2  (unfavourable bad) |
| --- | --- | --- | --- | --- |
| **3110 Oligotrophic waters containing very few minerals of sandy plains (*Littorelletalia uniflorae*)** | | | | |
| Habitat area |  | The area has not changed from the previous study | A decline in habitat area observed | The habitat disappeared from the monitored location |
| Specific structure and functions | Characteristic combination of communities within the transect | Patches of *Lobelietum dortmannae*, *Isoetetum lacustris* or *Myriophylletum alterniflori* association predominate. High diversity of species characteristic of LLs, great or massive occurrence of characteristic species: water lobelia *Lobelia dortmanna,* quillwort  *Isoëtes lacustris,* thorny quillwort *Isoëtes echinospora,* European  shoreweed *Littorella uniflora,* alternate water-milfoil *Myriophyllum alterniflorum,* floating waterplantain *Luronium natans.* | The vegetation of the *Isoeto- Lobelietum* asssociation scarcely present, domination of spiked water-milfoil *Myriophyllum* spicatum over alternate water-milfoil *Myriophyllum alterniflorum.* Little diversity among species characteristic of LLs,  sporadic characteristic species. | Species characteristic of Lobelia lakes recorded earlier do not occur in a lake or occur as single individuals or as accompanying species in communities of plants typical of eutrophic or dystrophic lakes |
| Species indicating degeneration of the habitat | Lack of species indicating degeneration of the habitat | Species indicating degeneration of the habitat occur as single individuals | Species indicating degeneration of the habitat such as *Nuphar lutea*, *Ceratophyllum demersum*, *Myriophyllum spicatum*, frogbit *Hydrocharis morsus-ranae* increase in their proportions in the communities |
| Water colour | Transparent, livid-blue or blue | Blue with a green or yellow-green tinge | Brown or visibly green |
| Water pH | pH 5.5–7.5 | pH <5.5 to 4.5 or  pH >7.5 to 8.5 | pH <4.5 or  pH >8.5 |
| Conductivity | <100 μS cm–1 | 100–250 μS cm–1 | >250 μS cm–1 |
| Water transparency | Secchi disc depth >3.5 m | Secchi disc depth 1.5–3.5 m | Secchi disc depth <1.5 m |
| Phytoplankton (auxiliary indicator) | In the dystrophic LLs, many mixotrophic taxa, chrysophytes or tiny green algae and/ or chroococcus blue-green algae occur. Also possible is the domination of dinophytes or cryptophytes as well as the occurrence of *Gonyostomum semen (Raphidophyceae)* | Co-domination of blue-green and green algae | Domination of filamentous blue-green algae, or those of the *Microcystis* and *Woronichinia* genera, blue-green algal blooms |
| Zooplankton  (auxiliary indicator) | *Rotatoria* and *Cladocera* occur often but at low densities, few *Copepoda*, large forms of filtrators/cladocerans *(Daphnia)* prevail | *Rotatoria* and small *Cladocera (Bosmina*, *Chydorus)* present | Domination of *Rotatoria*, particularly *Keratella cochlearis* f. *tecta* |
| Overall structure and functions | All FV or one U1 | Two or three U1, none U2 | One or more U2 |
| Conservation prospects |  | Conservation prospects for the habitat are good or excellent, no significant impact of threatening factors predicted, survival of the habitat in longer time perspective is very probable | Intermediate combinations | Conservation prospects for the habitat are bad, strong impact of threatening factors is predicted or observed, (draining of the area, improper management of lakes and land use in the catchment areas), no survival of the habitat can be guaranteed in the long term |
| Overall status |  | All FV or two FV and one U1 | One or more U1, none U2 | One or more U2 |
| **3130 oligo-to-mesotrophic waters (*Littorelletea Isoëto-Nanojuncetea*)** | | | | |
| Habitat area |  | No change or increase > 10% | Decrease from 10% to 30%. | Significant decrease (> 30%) in comparison to earlier studies or data given in the literature |
| Specific structure and functions | Spatial structure of habitat patches | No fragmentation or small fragmentation not resulting from anthropogenic factors | Significant fragmentation resulted from natural drivers; patches of habitat at a considerable distance, interspersed by patches of expansive vegetation, successively overgrowing the habitat | High degree of fragmentation resulted from antropogenic pressures (e.g. trampling, cutting, etc.) |
| Characteristic species | >3 species | 2-3 species | 1 species (U2 rating does not apply to *Litorelletea* communities) |
| Dominant species | In habitat patches dominate indicator species | Characteristic species are present among dominant species. No dominant species is also possible. | No characteristic species among the dominants in patches |
| Alien invasive species | >25% | 25-50% | <50% |
| Native species indicating degeneration of the habitat | <25% | 25-50% | >50% |
| The share of well-preserved habitat patches | >80% | 50-80% | <50% |
| Overall structure and functions | All FV or one U1 | Two or three U1, none U2 | One or more U2 |
| Conservation prospects |  | Conservation prospects for the habitat are good or excellent, no significant impact of threatening factors predicted, survival of the habitat in longer time perspective is very probable | Intermediate combinations | Conservation prospects for the habitat are bad, strong impact of threatening factors is predicted or observed, (draining of the area, improper management of lakes and land use in the catchment), no survival of the habitat can be guaranteed in the long term perspective |
| Overall status |  | All FV | One or more U1, none U2 | One or more U2 |
| **3140 hard oligo-mesotrophic waters with benthic vegetation of *Chara* spp** | | | | |
| Habitat area |  | No change or increase | Decrease < 20% | Significant decrease (> 20%) when compared to previous studies or reported in literature |
| Specific structure and functions | Structure of *Chara* spp. vegetation | >50% | 10-50% | <10% |
| Characteristic species | ≥ 4 species | 2-3 species | 1 species |
| Species indicating degeneration of the habitat include alien invasive species | Lack of species indicating degeneration of the habitat | <10% | >10% |
| Maximal depth of reach of *Chara spp*. :   - deep lakes >5 m maximum depth | >5m | 5-2.5m | <2.5m |
| - shallow lakes <5 m maximum depth) | lake overgrown with *Chara spp*. | <2,5 – 1m | 0.5 – 1m |
| The reach of euphotic zone in a lake   - deep lakes (>5 m maximum depth) | >15m | 15-10m | <10m |
| - shallow lakes (<5 m maximum depth) | to the bottom of the lake | <5 – 2,5m | <2.5 |
| Phytoplankton (auxiliary indicator) | domination of *Chlorophyte* or other groups including *Cyanophyta* | Co-domination of *Chlorophyte* and *Cyanophyta* | Domination of filamentous blue-green algae, or those of the *Microcystis, Woronichinia* genera, |
| Zooplankton  (auxiliary indicator) | *Rotatoria* and *Cladocera* occur often but at low densities, few *Copepoda*, prevalence of large forms of filtrators/cladocerans *(Daphnia)* | Presence of *Rotatoria* and small *Cladocera (Bosmina*, *Chydorus)* | Domination of *Rotatoria*, particularly *Keratella cochlearis* f. *tecta* |
| Overall structure and functions | All FV or one U1 | Two or three U1, none U2 | One or more U2 |
| Conservation prospects |  | Conservation prospects for the habitat are good or excellent, no significant impact of threatening factors predicted, survival of the habitat in longer time perspective is very probable | Intermediate combinations | Conservation prospects for the habitat are bad, strong impact of threatening factors is predicted or observed, no survival of the habitat can be guaranteed in the long term |
| Overall status |  | All FV | One or more U1, none U2 | One or more U2 |
| **3150 natural eutrophic lakes with *Magnopotamion* or *Hydrocharition*-type vegetation ( in Poland: 3150 Oxbow lakes and natural eutrophic water bodies with communities of *Nympheion, Potamion*)** | | | | |
| Habitat area |  | Not changed from the previous study | A decline in habitat area observed | The habitat disappeared from the monitored location |
| Specific structure and functions | Characteristic combination of communities within the transect | High diversity of phytocenoses; nympheids and elodeids are present.  Small pleustophytes present or not (if present in lakes <25% and oxbows <50% of water table cover). | No nympheids or elodeids, if both are present, *Ceratophyllum*  *demersum* among elodeids < 25%. Pleustophytes  present or not (if present in lakes >25% and oxbows >50% of water table cover) | One community of nympheids or eloids consists of 1 species only (**hull habitat**).  A fragmented community.  In case of protected community or rare species, the score remains as FV (applied to the following species: *Salvinia natans, Trapa natans, Nymphoides peltata*, various species from *Utricularia* spp.). |
| Indicators of habitat degradation | No alien or invasive species (the presence of *Elodea canadensis* is accepted). | Alien or invasive species are present as individuals (*Elodea canadensis* not considered). | Numerous alien species, present invasive species (*Elodea canadensis* not considered). |
| Water colour | Light green, slightly transparent, brownish-transparent | Distinct green color | Visible blue-green color  - like oil-spilled paint on  water surface |
| Conductivity | < 600 μS cm–1 | 600 – 899 μS cm–1 | > 900 μS cm–1 |
| Water transparency | Secchi disc depth >2.5 m | Secchi disc depth 1.0 – 2.5 m | Secchi disc depth < 1.0 m |
| Water pH | pH 6.5 – 7.9 | pH 8.0 – 9.0 | pH > 9.5 |
| Phytoplankton (auxiliary indicator) | domination of *Chlorophyte* or other groups include *Cyanophyta* | Co-domination of *Chlorophyte* and *Cyanophyta* | Domination of filamentous blue-green algae, or those of the  *Microcystis, Woronichinia,*  *długotrwałe Woronichinia* genera |
| Zooplankton  (auxiliary indicator) | *Rotatoria* and *Cladocera* occur often but at low densities, few *Copepoda*, prevalence of large forms of filtrators/cladocerans *(Daphnia)* | Presence of *Rotatoria* and small *Cladocera (Bosmina*, *Chydorus)* | Domination of *Rotatoria*, particularly *Keratella cochlearis* f. *tecta* |
| Overall structure and functions | All FV or one U1 | Two or three U1, none U2 | One or more U2 |
| Conservation prospects |  | Conservation prospects for the habitat are good or excellent, no significant impact of threatening factors predicted, survival of the habitat in longer time perspective is very probable.  In case of oxbow lakes additional assessment of river health (naturalness) is necessary: intact river, unmodified, natural channel, new oxbows appear. In case of modified river: <60% ,  floodplain terraces preserved, space for new oxbows not limited, possible periodical connectivity with the river. | Intermediate conditions.  In case of oxbow lakes additional assessment of river health (naturalness) is necessary: degree of channel modification 60% -90% but with ensured periodical connectivity with the river and potential possibility to create new oxbows. Possibility to decrease channel modification. | Conservation prospects for the habitat are bad, intense impact of external threats is expected or existing (drainage, poor management in the catchment and surrounding lakes and oxbow lakes, anthropopression, planned river regulation eliminating restoration of the habitat, etc.).  Survival in the long-term perspective cannot be guaranteed. In case of oxbow lakes additional assessment of river health (naturalness) is necessary: degree of channel modification >90% with dikes, no floodplain terraces, no connectivity with the river and any possibility to create new oxbows. Existing oxbows are overgrown and silted up. Disappearing or converted into gravel pits. |
| Overall status |  | All FV or two FV and one U1 | Two or three U1, none U2 | One or more U2 |
| **3160 natural dystrophic lakes and ponds (3160 natural dystrophic lakes)** | | | | |
| Habitat area |  | No change or increase > 10% | Habitat area declined from 10% to 30%. | Distinct habitat area declined (>30%) in comparison to earlier studies or literature. |
| Specific structure and functions | Characteristic species within the transect | Number of species and the area occupied has not changed or increased when compared to earlier studies. Possible lack of vegetation. If it is a natural state and the vegetation has not disappeared due to negative changes in the aquatic environment, such as: loss of light access, algal blooms, etc., the assessment remains at the appropriate FV level. If there is doubt as to whether the lack of characteristic species is the result of degeneration or the specifics of the tested reservoir, the assessment of this indicator should not cause a reduction in the overall rating if the remaining indicators (including auxiliary ones) indicate the state of FV. | Decline in species number and the area occupied < 20% (if no vegetation has been noted before, the lack of species does not change the assessment, i.e. the assessment remains at the FV level) | Significant disappearance of species or decrease of the occupied area > 20% (if no plants were noted before, the lack of species does not change the assessment, i.e. the assessment remains at the FV level). |
| Native species indicating degeneration of the habitat | Lack of species indicating degeneration of the habitat | Species indicating degeneration of the habitat occur as < 5% of the surface coverage | Species indicating degeneration of the habitat occupy > 5% of the surface coverage. |
| Invasive alien species indicating degeneration of the habitat | No invasive species  (*Elodea canadensis* acceptable). | invasive species present as individuals (*Elodea canadensis* not considered) | Abundant invasive species present (*Elodea canadensis* not considered). |
| Water colour | <50 mg Pt/dm-3 (or brown water colour, clear or small turbidity) | 51 – 100 mg Pt/dm-3 (or dark brown) | >101 mg Pt/dm-3 (or green or dark brown water colour with high amount of suspended solids) |
| Water pH | pH 3.0–7.0 | pH <7.0 to 8.0 or pH >2.0 to 3.0 | pH <2.0 or pH >8.0 |
| Conductivity | <100 μS cm–1 | 100–500 μS cm–1 | >500 μS cm–1 |
| Land reclamation | Lack of reclamation ditch network and other elements of drainage infrastructure or a drainage infrastructure sufficiently neutralized as a result of undertaken protective measures (backfilling of ditches, construction of weirs, etc.), lack of real threats at present and in the future. | Drainage network and other infrastructure elements has little impact on water conditions of reservoirs. | Drainage infrastructure has a significantly negative impact on water conditions |
| HDI | >50 | 40<HDI>50 | <40 (clear lack of dystrophication process) |
| Water transparency | Secchi disc depth >1.5 m | Secchi disc depth 0.5–1.5 m | Secchi disc depth <0.5 m |
|  | Domination of mixotrophic species,  possible also domination of *Conjugatae*,  poverty of diatom species, present acidophilic species. | High species variability of phytoplankton,  massive abundance of *Gonyostomum*  *semen* | Species preferring eutrophicated water.  Evident blue-green algae blooms |
| TDS | >60 mg dm-3 | 60-100 mg dm-3. | >100 mg dm-3 |
| Overall structure and functions | All FV or one U1 | Two or three U1, none U2 | One or more U2 |
| Conservation prospects |  | The following conditions are fulfilled:  peat bog with no hydrological disturbance, waterlogged. No peat harvesting, properly preserved peat vegetation. If piezometers installed: groundwater level 10 cm below the bog surface. | Lack of maintenance of existing weirs or their partial damage, overgrowth of ditches, inadequate fisheries management or peat bog with minor hydrological disturbances or small-scale peat extraction. Water level measured in a piezometer 10-30 cm below the bog surface. | Water level measured in a piezometer > 30 cm below the bog surface. Existing reclamation infrastructure significantly worsens hydrological conditions of the dystrophic and surrounding peat bog. Lack of real possibilities to improve conditions of the habitat. Peat bog drained with visible peat mowing processes. Large-scale extraction of peat. |
| Overall status |  | All FV or two FV and one U1 | Two or three U1, none U2 | One or more U2 |
| **3220 alpine rivers and the herbaceous vegetation along their banks** | | | | |
| Habitat area |  | The area has not changed from the previous study | A decline in habitat area observed (10-20%) | A decline in habitat area observed (<20%) |
| Specific structure and functions | Gravel banks width | >7-8 m | 2-7 m | <2m |
| Gravel banks cover by herbaceous vegetation | <30% | 30-60% | >60% |
| Height of herbaceous vegetation | <25-30 cm | 30-50 cm | >50 cm |
| Native species indicating degeneration of the habitat | Lack of species indicating degeneration of the habitat | Clumps of small or dispersed individuals around the transect | Mass occurrence |
| Invasive alien species indicating degeneration of the habitat | Lack of invasive alien species | Single or in small clumps, one species | Mass occurrence of one species or several |
| Shrub species | Species of native willows, characteristic of *Salici-Myricarietum; Alnus incana,* | Species associated with *Salici purpureae*, floodplain or hornbeam etc. forest habitats | Species from plantings and/or alien |
| Shrub density on the transect | None, only young or individuals | Clumps or scattered individuals throughout the space | Mass occurrence, especially in large clumps |
| Share of tree species (over 1.5 m high) | Lack of species indicating degeneration of the habitat | Clumps of small or dispersed individuals around the transect | Mass occurrence |
| The presence of the riverside habitat complex: 3220, 3230, 3240, 91E0 | 3 types of habitats | 2 types of habitats | Lack or one type of habitat |
| Overall structure and functions | All FV or one U1 | Two or three U1, none U2 | One or more U2 |
| Conservation prospects |  | Conservation prospects for the habitat are good or excellent, no significant impact of threatening factors predicted, survival of the habitat in longer time perspective is very probable. | Intermediate combinations | Conservation prospects for the habitat are bad, strong impact of threatening factors is predicted or observed, no survival of the habitat can be guaranteed in the long term perspective. |
| Overall status |  | All FV or two FV and one U1 | Two or three U1, none U2 | One or more U2 |
| **3240 alpine rivers and their ligneous vegetation with *Salix elaeagnos*** | | | | |
| Habitat area |  | The area has not changed from the previous study | A decline in habitat area observed (10-25%) | A decline in habitat area observed (<10%) |
| Specific structure and functions | Shrub species | *Salix eleagnos, S. purpurea, S. fragilis, S. triandra, Myricaria germanica* | Low share of *Salix eleagnos* and *Myricaria germanica* | No *Salix elaeagnos*at sites reported earlier with a distinct domination of one from among other exiting willow species |
| Height of shrubs | 1.5-3.0 cm | 0.5-1.5 cm | <0.5m or >3.0 cm |
| Shrub density on the transect | >30% | 10-30% | <10% |
| Native species indicating degeneration of the habitat | Lack of species indicating degeneration of the habitat | Clumps of small or dispersed individuals around the transect | Mass occurrence |
| Spatial structure of scrub patches | Mass occurrence | Clumps of small or dispersed individuals around the transect | Lack or single representatives |
| Share of tree species (over 3.0 m high) | Lack of species indicating degeneration of the habitat | Single expanded  trees or small ones  clumps | Presence of numerous trees of considerable height (>5 m) |
| Health condition of willow shrubs | No evident deterioration in the health of the bushes or only single damaged bushes | Individual signs of poor health or damage due to natural causes | Frequent cases of poor health, a large proportion of damaged or attacked shrubs |
| Willow renewal (clearing of shrubs other than willow) | Commonly occurring | Present but few | Lack |
| Species of expansive herbaceous plants | Lack or dispersed individuals of the same species | Clumps or dispersed individuals throughout the habitat area | Mass occurrence of one or a few species |
| Invasive alien species indicating degeneration of the habitat | Lack of invasive alien species | Single or in small clumps, one species | Mass occurrence of one species or a few species |
| The presence of the riverside habitat complex: 3220, 3230, 3240, 91E0 | 3 types of habitats | 2 types of habitats | Lack or one type of habitat |
| Overall structure and functions | All FV or one U1 | Two or three U1, none U2 | One or more U2 |
| Conservation prospects |  | Conservation prospects for the habitat are good or excellent, no significant impact of threatening factors predicted, survival of the habitat in longer time perspective is very probable | Intermediate combinations | Conservation prospects for the habitat are bad, strong impact of threatening factors is predicted or observed, no survival of the habitat can be guaranteed in the long term perspective. |
| Overall status |  | All FV or two FV and one U1 | Two or three U1, none U2 | One or more U2 |
| **3260 water courses of plain to montane levels with *Ranunculion fluitantis* and *Callitricho-Batrachion* vegetation** | | | | |
| Habitat area |  | The area has not changed from the previous study | A decline in habitat area observed (10-25%) | A decline in habitat area observed (<10%) |
| Specific structure and functions | Characteristic species: water buttercup - *Batrachium* spp. | Transect covered with water buttercup (excluding *B. circinatum*) at least  2. | Transect cover with water buttercup (excluding *B. circinatum*) at least 1. | No water buttercup or *B. circinatum* only |
| Characteristic species: other | Presence of at least 2 characteristic species | Presence of 1 characteristic species | Lack of characteristic species |
| Bottom sediment substrate | At least 20% of coarse substrate (stones, gravel, pebbles) and max. 20% of muddy material. | Maximum 20% of muddy material in the bottom | > 20% of muddy material in the bottom |
| Assessment of ecological status | I or II class | III class | IV or V class |
| Coverage of the transect by *Elodea canadensis* | 0-2 (MMOR) | 3-5 (MMOR) | >5 (MMOR) |
| Flow | > 40% of fast-flowing water (rapids, surges). | 10-40% of fast-flowing water (rapids, surges). | < 10% of fast-flowing water (rapids, surges). |
| River water damming | No | Yes, < 33% watercourse section | Yes, > 33% watercourse section |
| Habitat Quality Assestment | <50 | 30-50 | >30 |
| Habitat Modification Score | >20 | 20-40 | <40 |
| Natural morphological elements | 3 | 1-2 | Lack |
| Shading the river | >50 | 50-80 | <80 |
| Invasive alien species indicating degeneration of the habitat | 1-2 invasive alien species (<33%) | 3-4 invasive alien species (<33%) | >4 invasive alien species (at least one, which is numerous >33%) |
| Sewage | No | Yes | Yes + stagnant water retaining sewage or ground by the river soaked with sewage |
| Area covered by protected species | Coverage with protected species of *Batrachium* spp. (water buttercup) at least 3 on the MMOR scale | Coverage with protected species of *Batrachium* spp. (water buttercup) at least 1-2 on the MMOR scale | No with protected species of *Batrachium* spp. or *R. circinatum*, only |
| Overall structure and functions | Max. 2 indicators U2 or 3 indicators U1, others FV | Max. 2 cardinal indicators U2 (U1 with no limits) | > 2 cardinal indicators U2 |
| Conservation prospects |  | Conservation prospects for the habitat are good or excellent, no significant impact of threatening factors predicted, survival of the habitat in longer time perspective is very probable | Intermediate combinations | Conservation prospects for the habitat are bad, strong impact of threatening factors is predicted or observed, no survival of the habitat can be guaranteed in the long term perspective |
| Overall status |  | All FV or two FV  and one U1 | Two or three U1,  none U2 | One or more U2 |
| **3270 rivers with muddy banks with *Chenopodion rubri* p.p. and *Bidention* p.p. vegetation** | | | | |
| Habitat area |  | The area has not changed from the previous study | A decline in habitat area observed (10-25%) | A decline in habitat area observed (<10%) |
| Specific structure and functions | Characteristic species | > 4 characteristic species | 3-4 characteristic species | < 3 characteristic species |
|  | Dominating species | Characteristic species are dominating | Among dominating species both characteristic species and invasive or alien species occur. | Among dominating species only invasive or alien species for the habitat occur. |
|  | Invasive alien species indicating degeneration of the habitat | No invasive species, but if present they cover <25% of the habitat area. | Present on 25-50% of the habitat area. | Present on > 50% of the habitat area. |
|  | Species of expansive herbaceous plants | Lack, or no more than 10% of the habitat area. | 10-25% of the habitat area. | > 25% of the habitat area. |
|  | Share of well-preserved patches of the habitat | Well-preserved patches cover >80% of the habitat area | Well-preserved patches cover 50-79% of the habitat area | Well-preserved patches cover < 50% of the habitat area |
|  | Overall structure and functions | All cardinal indices FV , other indices at least U1 | All cardinal indices at least U1, | One or more cardinal indices U2. |
| Conservation prospects |  | Conservation prospects for the habitat are good or excellent, no significant impact of threatening factors predicted, survival of the habitat in longer time perspective is very probable | Intermediate combinations | Conservation prospects for the habitat are bad, strong impact of threatening factors is predicted or observed, no survival of the habitat can be guaranteed in the long term perspective. |
| Overall status |  | All FV | One or two U1, none U2 | One or more U2 |

**References**

1. Mróz W (2010) Monitoring of natural habitats. Methodological guide. Library of Environmental Monitoring. Inspection of Environmental Protection. Part I. Warsaw <http://siedliska.gios.gov.pl/images/pliki_pdf/publikacje/Monitoring-siedlisk-przyrodniczych.-Przewodnik-metodyczny.-Cz-I.pdf> (Accessed September 2019)
2. Mróz W (2012a) Monitoring of natural habitats. Methodological guide. Library of Environmental Monitoring. Inspection of Environmental Protection. Part II. Warsaw <http://siedliska.gios.gov.pl/images/pliki_pdf/publikacje/Monitoring-siedlisk-przyrodniczych.-Przewodnik-metodyczny.-Cz-II.pdf> (Accessed September 2019)
3. Mróz W (2012b) Monitoring of natural habitats. Methodological guide. Library of Environmental Monitoring. Inspection of Environmental Protection. Part III. Warsaw <http://siedliska.gios.gov.pl/images/pliki_pdf/publikacje/Monitoring-siedlisk-przyrodniczych.-Przewodnik-metodyczny.-Cz-III.pdf> (Accessed September 2019)
4. Mróz W (2015) Monitoring of natural habitats. Methodological guide. Library of Environmental Monitoring. Inspection of Environmental Protection. Part IV. Warsaw <http://siedliska.gios.gov.pl/images/pliki_pdf/publikacje/Monitoring-siedlisk-przyrodniczych.-Przewodnik-metodyczny.-Cz-IV.pdf> (Accessed September 2019)
5. Mróz W (2017) Monitoring of natural habitats. Methodological guide. Introduction. Library of Environmental Monitoring. Inspection of Environmental Protection. Warsaw <http://siedliska.gios.gov.pl/images/pliki_pdf/publikacje/methodological_guides/Introduction.pdf> (Accessed September 2019)

**Appendix 3**

A list of threats, activities and pressures on freshwater habitats according to Eionet 2018a:

**A – agriculture;**

A01 – cultivation;

A02.02 – crop change;

A03 – mowing / cutting of grassland;

A03.02 – non intensive mowing;

A04 – grazing;

A04.01 – intensive grazing; A04.02 – non intensive grazing; A04.02.01 – non intensive cattle grazing; A04.03 – abandonment of pastoral systems, lack of grazing; A06.01 – annual crops for food production;

A07 – use of biocides, hormones and chemicals;

A08 – fertilisation;

A10 – restructuring agricultural land holding;

A11 – agriculture activities not referred to above;

**B – sylviculture, forestry;**

B01 – forest planting on open ground;

B01.02 – artificial planting on open ground (non–native trees);

B02 – forest and plantation management & use;

B02.01 – forest replanting; B02.02 – forestry clearance; B02.04 – removal of dead and dying trees;

B07 – forestry activities not referred to above;

**C – mining, extraction of materials and energy production;**

C01.01– sand and gravel extraction; C01.01.02 – removal of beach materials; C01.03 – peat extraction; C01.04 – mines; C01.04.01 – open cast mining; C01.04.02 – underground mining;

**D – transportation and service corridors;**

D01 – roads, paths and railroads;

D01.01– paths, tracks, cycling tracks; D01.02 – roads, motorways; D01.03 – car parks and parking areas; D01.04 – railway lines, TGV; D01.05 – bridge, viaduct;

D03.02 – shipping lanes; D03.02.02 – passenger ferry lanes (high speed);

D05 – improved access to site;

**E – urbanisation, residential and commercial development;**

E01 – urbanised areas, human habitation;

E01.01 – continuous urbanisation; E01.02 – discontinuous urbanisation; E01.03 – dispersed habitation; E01.04 – other patterns of habitation;

E02 – industrial or commercial areas;

E02.01 – factory;

E03 – discharges;

E03.01 – disposal of household / recreational facility waste; E03.04 – other discharges;

E03.04.01 – costal sand suppletion/ beach nourishment;

**F – biological resource use other than agriculture & forestry;**

F01 – marine and freshwater aquaculture;

F01.01 – intensive fish farming; F01.03 – bottom culture;

F02 – fishing and harvesting aquatic ressources;

F02.01 – professional passive fishing; F02.01.01 – potting; F02.01.02 – netting; F02.02 – professional active fishing; F02.02.03 – demersal seining; F02.03 – leisure fishing; F02.03.02 – pole fishing; F02.03.03 – spear–fishing;

F03.02.09 – other forms of taking animals;

F04 – taking / removal of terrestrial plants, general;

F04.01 – pillaging of floristic stations; F04.02 – collection (fungi, lichen, berries etc.);

F05.04 – poaching;

**G – human intrusions and disturbances;**

G01 – Outdoor sports and leisure activities, recreational activities; G01.01 – nautical sports; G01.01.01 –motorized nautical sports; G01.02– walking, horseriding and non–motorised vehicles; G01.03 – motorised vehicles; G01.07 – scubadiving, snorkelling; G01.08 – other outdoor sports and leisure activities;

G02 – sport and leisure structures; G02.08 – camping and caravans; G02.09 – wildlife watching; G02.10 – other sport/leisure complexes;

G03 – interpretative centres;

G04.01 – military manouvres;

G05 – other human intrusions and disturbances; G05.01 – trampling, overuse; G05.04 – vandalism; G05.05 – intensive maintenance of public parks /cleaning of beaches; G05.07 – missing or wrongly directed conservation measures;

**H – pollution;**

H01 – pollution to surface waters (limnic, terrestrial, marine & brackish);

H01.03 – other point source pollution to surface water; H01.04 – diffuse pollution to surface waters via storm overflows or urban run–off; H01.05 – diffuse pollution to surface waters due to agricultural and forestry activities; H01.06 – diffuse pollution to surface waters due to transport and infrastructure without connection to canalization/sweepers; H01.08 – diffuse pollution to surface waters due to household sewage and waste waters; H01.09 – diffuse pollution to surface waters due to other sources not listed;

H02 – pollution to groundwater (point sources and diffuse sources);

H04 – air pollution, air–borne pollutants;

H05.01 – garbage and solid waste;

**I – invasive, other problematic species and genes;**

I01 – invasive non–native species;

**J - natural system modifications**;

J01 – fire and fire suppression;

J02 – human induced changes in hydraulic conditions;

J02.01 – landfill, land reclamation and drying out, general; J02.01.02 – reclamation of land from sea, estuary or marsh; J02.01.03 – infilling of ditches, dykes, ponds, pools, marshes or pits; J02.02 – removal of sediments (mud...); J02.03 – canalisation & water deviation; J02.03.02 – canalisation; J02.04 – flooding modifications; J02.04.01 – flooding; J02.04.02 – lack of flooding; J02.05 – modification of hydrographic functioning, general; J02.05.02 – modifying structures of inland water courses; J02.05.03 – modification of standing water bodies; J02.05.04 – reservoirs; J02.06 – water abstractions from surface waters; J02.06.06 – surface water abstractions by hydro–energy; J02.06.08 – surface water abstractions for navigation; J02.07 – water abstractions from groundwater; J02.08 – raising the groundwater table /artificial recharge of groundwater; J02.09 – saltwater intrusion of groundwater; J02.09.02 – other intrusion; J02.11 – siltation rate changes, dumping, depositing of dredged deposits; J02.12 – dykes, embankments, artificial beaches, general;

J03 – other ecosystem modifications;

J03.01 – reduction or loss of specific habitat features; J03.02 – anthropogenic reduction of habitat connectivity; J03.03 – reduction, lack or prevention of erosion;

**K** – **natural biotic and abiotic processes (without catastrophes);**

K01 – abiotic (slow) natural processes;

K01.01 – erosion; K01.02 – silting up; K01.03 – drying out; K01.04 – submersion; K01.05 – soil salinization;

K02 - biocenotic evolution, succession;

K02.01 – species composition change (succession); K02.02 – accumulation of organic material; K02.03 – eutrophication (natural); K02.04 – acidification (natural);

K03 – interspecific faunal relations; K03.04 – predation;

K04 – interspecific floral relations;

K04.01 – competition;

K05.01 – reduced fecundity/ genetic depression in animals (inbreeding);

**L - geological events, natural catastrophes;**

L08 – inundation (natural processes);

**M - climate change**;

M01 – changes in abiotic conditions;

M01.02 – droughts and less precipitations; M01.03 - flooding and rising precipitations; M01.04 – pH-changes; M01.05 – water flow changes (limnic, tidal and oceanic);

M02 – changes in biotic conditions; M02.03 – decline or extinction of species;

**X** – **no threats or pressures**
